# Supplementary material for: Immunolocalization of Nesfatin-1 in the Gastrointestinal Tract of the Common Bottlenose Dolphin Tursiops truncatus
Source: MDPI journal article supplement (doi:10.3390/ani12162148), 2022-08-22
Supplement: s1 [file s1]

# Immunolocalization of Nesfatin-1 in the gastrointestinal tract of the common bottlenose dolphin *Tursiops truncatus*

Elena De Felice<sup>†1\*</sup>, Claudia Gatta<sup>†2</sup>, Daniela Giaquinto<sup>2</sup>, Federica Fioretto<sup>1</sup>, Lucianna Maruccio<sup>2</sup>, Danila d'Angelo<sup>2</sup>, Paola Scocco<sup>1</sup>, Paolo de Girolamo<sup>2</sup> and Livia D'Angelo<sup>2</sup>

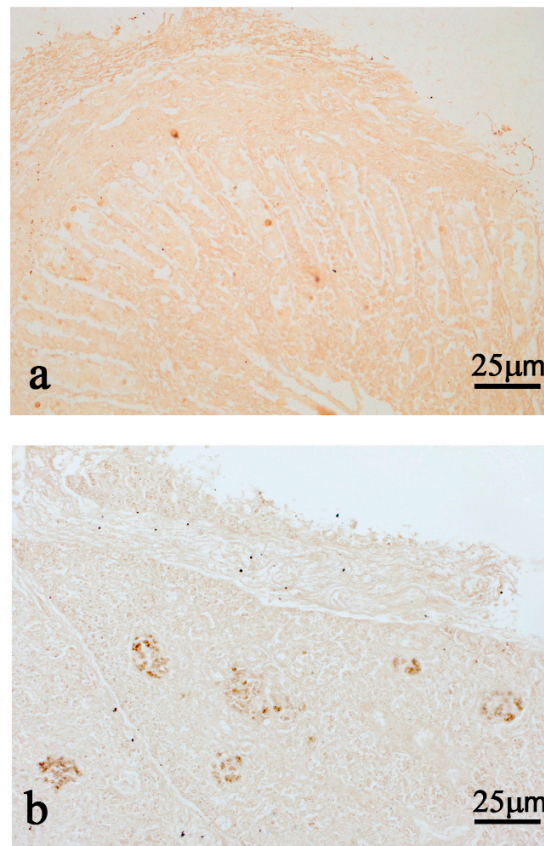

**Figure S1.** Immunohistochemistry negative and positive controls of anti-Nesf-1 in *Tursiops truncatus*. Negative control of intestine (a). Positive control of pancreas, showing Nesf-1 positive immunoreactivity in pancreatic islet (b).

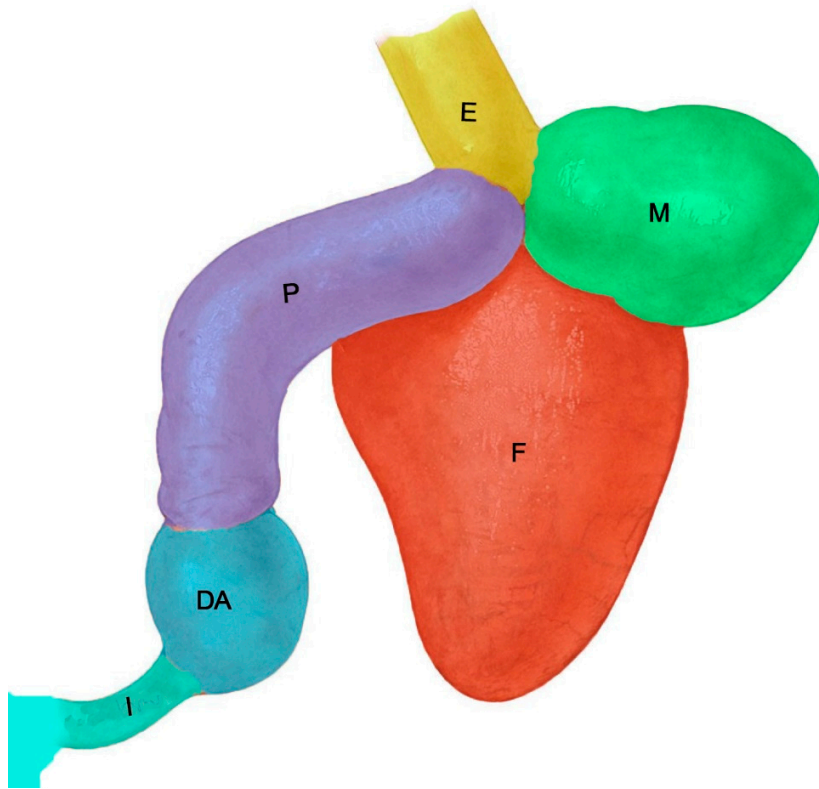

**Figure S2.** Schematic drawing of the gastrointestinal tract of the *Tursiops truncatus*: (E) esophagus; (F) forestomach or first chamber; (M) main stomach or second chamber; (P) pyloric stomach or third chamber, (DA) duodenal ampulla and (I) intestine.
